# Supplementary material
Source: MDPI journal article supplement (https://www.mdpi.com/2072-4292/12/7/1203)
Supplement: s1 [file s1]

# Supplementary Material

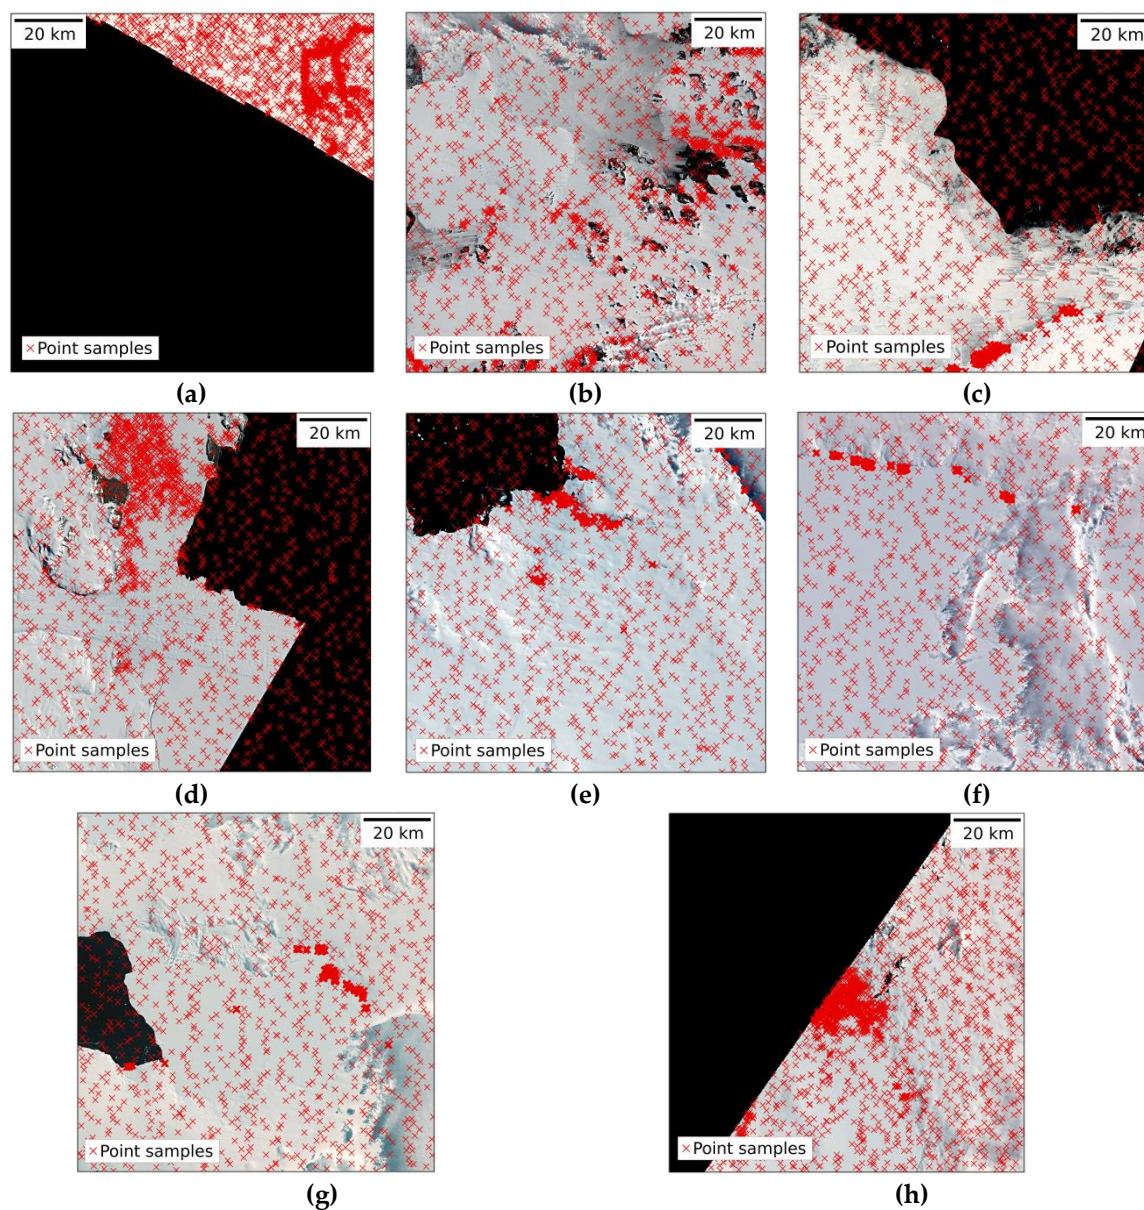

**Figure. S1.** Distribution of sampling points within the test scenes of (a) Nivlisen Ice Shelf, (b) Amundsen Bay, (c) Wilhelm II Coast, (d) Drygalski Ice Tongue, (e) Hull Glacier, (f) Abbott Ice Shelf (g) Cosgrove Ice Shelf and (h) George VI Ice Shelf.

**Table S1.** Sentinel-2 test data covering the 2017, 2018, 2019 and 2020 melt seasons over Amery Ice Shelf.

| Number           | Date             | Relative Orbit |
|------------------|------------------|----------------|
| Melt Season 2017 |                  |                |
| 1                | 08 January 2017  | 75             |
| 2                | 08 January 2017  | 75             |
| 3                | 08 January 2017  | 75             |
| 4                | 27 January 2017  | 61             |
| 5                | 27 January 2017  | 61             |
| 6                | 27 January 2017  | 61             |
| 7                | 27 January 2017  | 61             |
| 8                | 27 January 2017  | 61             |
| 9                | 27 January 2017  | 61             |
| 10               | 27 January 2017  | 61             |
| 11               | 27 January 2017  | 61             |
| 12               | 27 January 2017  | 61             |
| 13               | 28 January 2017  | 75             |
| 14               | 28 January 2017  | 75             |
| 15               | 28 January 2017  | 75             |
| 16               | 28 January 2017  | 75             |
| Melt Season 2018 |                  |                |
| 1                | 13 January 2018  | 75             |
| 2                | 13 January 2018  | 75             |
| 3                | 13 January 2018  | 75             |
| 4                | 13 January 2018  | 75             |
| 5                | 13 January 2018  | 75             |
| 6                | 13 January 2018  | 75             |
| 7                | 13 January 2018  | 75             |
| 8                | 22 January 2018  | 61             |
| 9                | 22 January 2018  | 61             |
| 10               | 22 January 2018  | 61             |
| 11               | 23 January 2018  | 75             |
| 12               | 23 January 2018  | 75             |
| 13               | 11 February 2018 | 61             |
| Melt Season 2019 |                  |                |
| 1                | 02 January 2019  | 61             |
| 2                | 02 January 2019  | 61             |
| 3                | 02 January 2019  | 61             |
| 4                | 02 January 2019  | 61             |
| 5                | 02 January 2019  | 61             |
| 6                | 03 January 2019  | 75             |
| 7                | 03 January 2019  | 75             |
| 8                | 03 January 2019  | 75             |
| 9                | 12 January 2019  | 61             |
| 10               | 12 January 2019  | 61             |
| 11               | 12 January 2019  | 61             |
| 12               | 12 January 2019  | 61             |
| 13               | 12 January 2019  | 61             |
| 14               | 12 January 2019  | 61             |
| 15               | 13 January 2019  | 75             |
| 16               | 13 January 2019  | 75             |
| 17               | 13 January 2019  | 75             |

|                  |                 |    |
|------------------|-----------------|----|
| 18               | 13 January 2019 | 75 |
| 19               | 13 January 2019 | 75 |
| 20               | 13 January 2019 | 75 |
| 21               | 13 January 2019 | 75 |
| <hr/>            |                 |    |
| Melt Season 2020 |                 |    |
| <hr/>            |                 |    |
| 1                | 07 January 2020 | 61 |
| 2                | 07 January 2020 | 61 |
| 3                | 07 January 2020 | 61 |
| 4                | 07 January 2020 | 61 |
| 5                | 07 January 2020 | 61 |
| 6                | 07 January 2020 | 61 |
| 7                | 07 January 2020 | 61 |
| 8                | 07 January 2020 | 61 |
| 9                | 07 January 2020 | 61 |
| 10               | 07 January 2020 | 61 |
| 11               | 07 January 2020 | 61 |
| 12               | 07 January 2020 | 61 |
| 13               | 08 January 2020 | 75 |
| 14               | 08 January 2020 | 75 |
| 15               | 08 January 2020 | 75 |
| 16               | 18 January 2020 | 75 |
| 17               | 18 January 2020 | 75 |
| 18               | 18 January 2020 | 75 |
| 19               | 18 January 2020 | 75 |
| 20               | 18 January 2020 | 75 |
| 21               | 18 January 2020 | 75 |
| 22               | 18 January 2020 | 75 |
| 23               | 18 January 2020 | 75 |
| 24               | 18 January 2020 | 75 |
| 25               | 18 January 2020 | 75 |
| 26               | 18 January 2020 | 75 |
| 27               | 18 January 2020 | 75 |
| 28               | 18 January 2020 | 75 |
| 29               | 18 January 2020 | 75 |
| 30               | 18 January 2020 | 75 |
| 31               | 18 January 2020 | 75 |
| 32               | 18 January 2020 | 75 |
| 33               | 18 January 2020 | 75 |
| 34               | 27 January 2020 | 61 |
| <hr/>            |                 |    |

**Table S2.** List of acronyms introduced throughout the paper.

| <b>Acronyms</b> |                                                                   |
|-----------------|-------------------------------------------------------------------|
| ADD             | Antarctic Digital Database                                        |
| AIS             | Antarctic Ice Sheet                                               |
| API             | Antarctic Peninsula                                               |
| ASTER           | Advanced Spaceborne Thermal Emission and Reflection Radiometer    |
| AWEI            | Automated Water Extraction Index                                  |
| BOA             | Bottom-Of-Atmosphere                                              |
| DEM             | Digital Elevation Model                                           |
| EA              | Expected Accuracy                                                 |
| EAIS            | East Antarctic Ice Sheet                                          |
| EC              | Errors of Commission                                              |
| EO              | EO                                                                |
| ESA             | European Space Agency                                             |
| F <sub>1</sub>  | F-measure                                                         |
| FN              | False Negatives                                                   |
| FNR             | False Negative Rate                                               |
| FP              | False Positives                                                   |
| FPR             | False Positive Rate                                               |
| GrIS            | Greenland Ice Sheet                                               |
| ICESat          | Ice, Cloud and Land Elevation Satellite                           |
| K               | Kappa                                                             |
| MEaSUREs        | Making Earth System Data Records for Use in Research Environments |
| ML              | Machine Learning                                                  |
| MOA             | Mosaic of Antarctica                                              |
| MODIS           | Moderate Resolution Imaging Spectroradiometer                     |
| MSI             | MultiSpectral Instrument                                          |
| NASA            | National Aeronautics and Space Administration                     |
| NDGI            | Normalized Difference Glacier Index                               |
| NDI             | Normalized Difference Index                                       |
| NDSI            | Normalized Difference Snow Index                                  |
| NDWI            | Normalized Difference Water Index                                 |
| NIR             | Near-Infrared                                                     |
| NWI             | New Water Index                                                   |
| OA              | Overall Accuracy                                                  |
| OOB             | Out-Of-Bag                                                        |
| P               | Precision                                                         |
| R               | Recall                                                            |
| REMA            | Reference Elevation Model of Antarctica                           |
| RF              | Random Forest                                                     |
| ROI             | Region of Interest                                                |
| S2A             | Sentinel-2A                                                       |
| S2B             | Sentinel-2B                                                       |
| SAR             | Synthetic Aperture Radar                                          |
| SAVI            | Soil-Adjusted Vegetation Index                                    |
| SCL             | Scene Classification Layer                                        |
| SI              | Shadow Index                                                      |
| SMB             | Surface Mass Balance                                              |
| SWI             | Soil/Water Index                                                  |
| SWIR            | Shortwave Infrared                                                |
| TC              | Tasseled Cap                                                      |
| TN              | True Negatives                                                    |
| TOA             | Top-Of-Atmosphere                                                 |
| TP              | True Positives                                                    |
| TS              | Total Samples                                                     |
| WAIS            | West Antarctic Ice Sheet                                          |
